Belgium, Division of Intensive care, Brussels, Belgium,<sup>9</sup>Cliniques Universitaires Saint-Luc, Brussels, Belgium, Institut de Recherche Expérimentale et Clinique, Brussels, Belgium and <sup>10</sup>Cliniques Universitaires Saint-Luc, Brussels, Belgium, Department of Abdominal Surgery and Transplantation, Brussels, Belgium

**BACKGROUND AND AIMS:** Recurrence of anti-glomerular basement membrane (anti-GBM) glomerulonephritis in the kidney graft is a rare event, described in limited case reports and registry analysis. The aim of this study was to evaluate in a large cohort of patients with detailed data collection and long follow-up the risk of recurrence of anti-GBM disease and graft loss caused by recurrence, the risk factors associated with clinical recurrence and the long-term patient and graft survival. **METHOD:** Multicenter retrospective study. Inclusion criteria: patients with anti-GBM glomerulonephritis transplanted with a kidney between 1977 and 2015. Exclusion criteria: systemic vasculitis (except ANCA), lupus erythematosus and cryoglobulinemia. Clinical recurrence was defined as reappearance of signs of glomerulonephritis along with histological signs of proliferative glomerulonephritis and linear IgG staining on kidney biopsy, with or without anti-GBM antibodies. **RESULTS:** Fifty-three patients were included. Clinical recurrence in a first kidney transplant occurred in only one patient five years after transplantation -a prevalence rate of 1.9%- in the context of cessation of immunosuppressive drugs. The graft was lost due to recurrence. Histological recurrence with linear IgG staining on kidney biopsy in the absence of histologic signs of proliferative glomerulonephritis was observed in four patients, in the context of cellular rejection. Two patients lost their kidney graft from severe acute rejection; the others fully recovered. Patient survival was 100%, 94% and 89% at 5, 10 and 15 years, respectively. Overall, death-censored first graft survival rates were 88%, 83% and 79% at 5, 10 and 15 years, respectively. **CONCLUSION:** Recurrence rate of anti-GBM glomerulonephritis after transplantation is very low, and associated with graft loss. The long-term patient and graft survival rates are excellent.

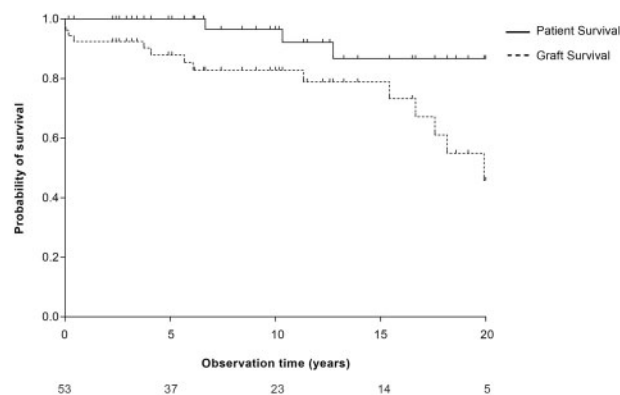

MO939

# **RECURRENCE AND OUTCOME OF ANTI-GLOMERULAR BASEMENT MEMBRANE GLOMERULONEPHRITIS AFTER KIDNEY TRANSPLANTATION: A BELGIAN MULTICENTER STUDY**

Sophie Coche<sup>1</sup>, Ben Sprangers<sup>2,3</sup>, Steven Van Laecke<sup>4</sup>, Laurent Weekers<sup>5</sup>, Vicky De Meyer<sup>6</sup>, Rachel Hellemans<sup>7</sup>, Diego Castanares<sup>8</sup>, Heleen Ameye<sup>2</sup>, Eric Jean Goffin<sup>1,9</sup>, Nathalie Demoulin<sup>1,9</sup>, Valentine Gillion<sup>1,9</sup>, Michel Mourad<sup>9,10</sup>, Tom Darius<sup>9,10</sup>, Buemi Antoine<sup>10</sup>, Devresse Arnaud<sup>1,9</sup>, Nada Kanaan<sup>1,9</sup>

<sup>1</sup>Cliniques Universitaires Saint-Luc, Brussels, Belgium, Division of Nephrology, Brussels, Belgium, <sup>2</sup>Katholieke Universiteit Leuven, Division of Nephrology, Leuven, Belgium, <sup>3</sup>Katholieke Universiteit Leuven, Department of Microbiology, Immunology and Transplantation, Laboratory of Molecular Immunology, Rega Institute, Leuven, Belgium, <sup>4</sup>Ghent University Hospital, Division of Nephrology, Ghent, Belgium, <sup>5</sup>Centre Hospitalier Universitaire Sart-Tilman, Division of Nephrology, Liège, Belgium, <sup>6</sup>Vrije Universiteit Brussel, Division of Nephrology, Ixelles, Belgium, <sup>7</sup>Universitair Ziekenhuis Antwerpen, Division of Nephrology, Edegem, Belgium, <sup>8</sup>Cliniques Universitaires Saint-Luc, Brussels,

MO939 Figure 1: Kaplan-Meier curve. Patient survival and death-censored first graft survival after kidney transplantation for anti-GBM glomerulonephritis.
